# Supplementary material for: Deep Learning for 3D Seismic Fault Prediction Using Convolutional Neural Networks (CNNs)
Source: Research Square preprint supplement (doi:10.21203/rs.3.rs-7967322/v1), 2025-10-30
Supplement: Supplementary file 1 [file 220c309f27c42fcf36e97965.docx]

Highlights

Deep Learning for 3D Seismic Fault Prediction Using Convolutional Neural Networks (CNNs)

Yasir Bashir*, a, Dilek Yüksel a, Begüm Akin a, Derin Gezer a, Muhsan Ehsanb, Muhammad Khanc, Syed Haroon Alid

- A U-Net-based CNN was developed for automated 3D seismic fault detection.
- Optimal fault prediction achieved with moderate training data volume (12,000 patches).
- Class imbalance limited fault detection; binary cross-entropy loss proved insufficient.
- The model generalized well to unseen data, validated by real seismic time-slices.
- Findings support scalable, reproducible deep learning workflows for seismic interpretation.
